# Supplementary material for: Insulin regulates Rab3–Noc2 complex dissociation to promote GLUT4 translocation in rat adipocytes
Source: PubMed Central journal article supplement (PMC4499112; doi:10.1007/s00125-015-3627-3), 2015-05-30
Supplement: 125_2015_3627_MOESM4_ESM.pdf [file 125_2015_3627_MOESM4_ESM.pdf]

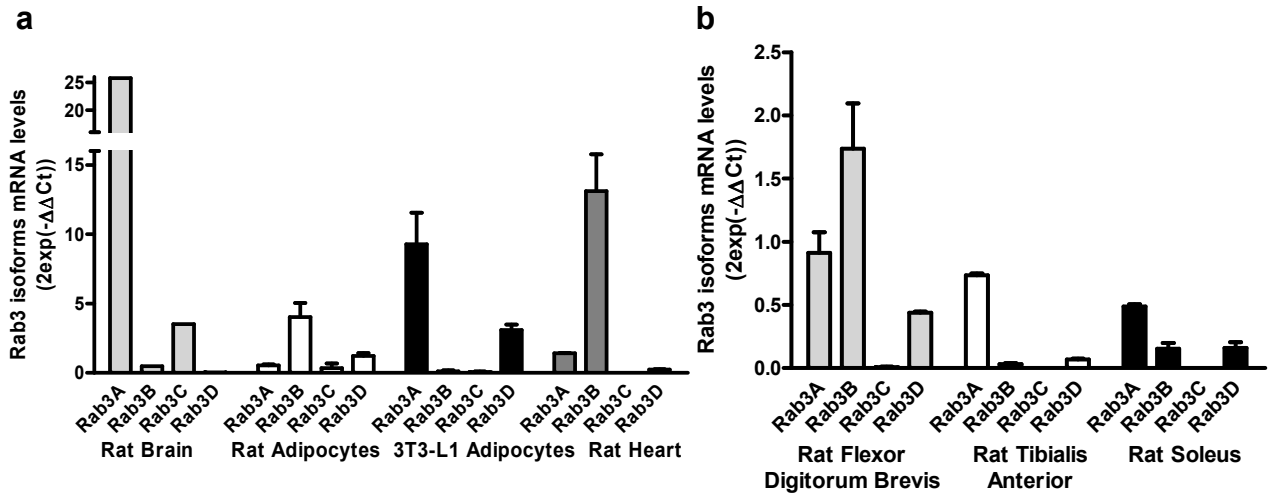

**ESM Fig. 3. Rab3 isoforms mRNA levels in insulin sensitive tissues.** (a) qRT-PCR analysis of *Rab3 A, B, C* and *D* mRNA in rat brain, rat adipocytes, 3T3-L1 adipocytes and rat heart. Results are mean and SEM from 3 independent experiments. (b) qRT-PCR analysis of *Rab3 A, B, C,* and *D* mRNA in *Flexor digitorum brevis, Tibialis anterior* and *Soleus* rat skeletal muscle. Data are mean  $\pm$  SEM from 3 independent experiments.
