# Supplementary material for: Insulin regulates Rab3–Noc2 complex dissociation to promote GLUT4 translocation in rat adipocytes
Source: PubMed Central journal article supplement (PMC4499112; doi:10.1007/s00125-015-3627-3), 2015-05-30
Supplement: 125_2015_3627_MOESM6_ESM.pdf [file 125_2015_3627_MOESM6_ESM.pdf]

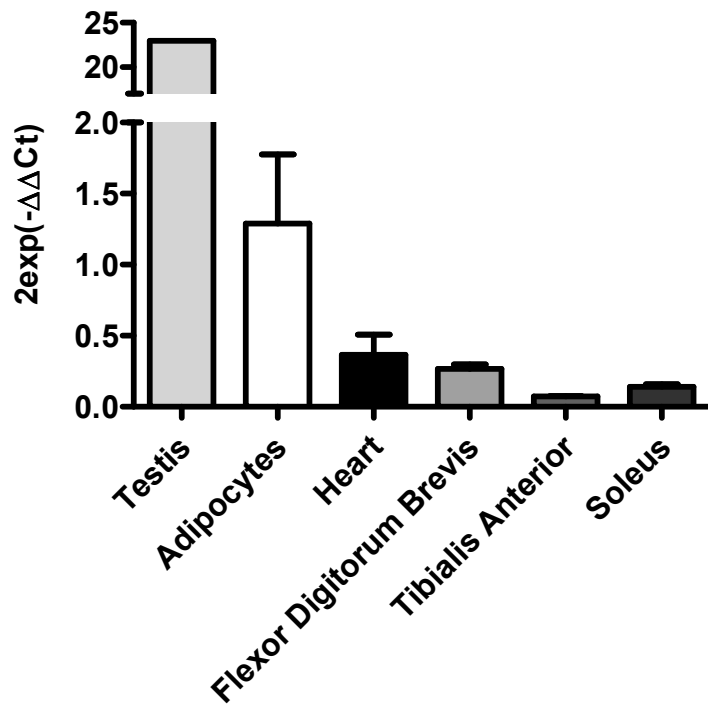

**ESM Fig. 5. mRNA levels of *Noc2 (Rph3al)* in rat insulin sensitive tissues.** Relative abundance of *Rph3al* mRNA in rat testis, adipocytes, heart, *Flexor digitorum brevis*, *Tibialis anterior* and *Soleus* skeletal muscles assessed by qRT-PCR. Data are mean ± SEM from 3 independent experiments.
