# Supplementary material for: Insulin regulates Rab3–Noc2 complex dissociation to promote GLUT4 translocation in rat adipocytes
Source: Springer Nature journal article supplement (doi:10.1007/s00125-015-3627-3), 2015-05-29
Supplement: MOESM3 [file 8093050]

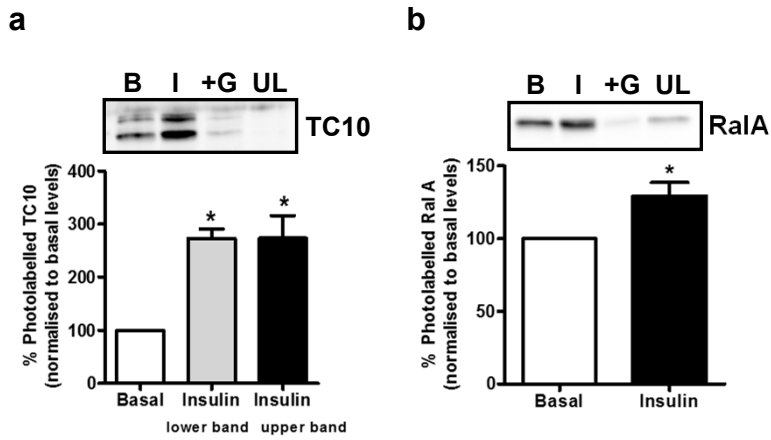

**ESM Fig. 2. Photolabelling of GTPases involved in GLUT4 trafficking.** Total membrane preparations from rat adipocytes (300  $\mu\text{g}/\text{condition}$ ) were photolabelled with Bio-ATB-GTP. Biotinylated proteins were streptavidin precipitated and immunoblotted with antibodies against the target proteins: **a.** TC10, **b.** RalA. Data are mean  $\pm$  SEM from at least 3 independent experiments. \*  $p < 0.05$  vs basal. The images are representative immunoblots for each set of quantified data. B – basal; I – insulin; +G – 400 fold excess of GTP; UL – no Bio-ATB-GTP added.
