# Supplementary material for: Insulin regulates Rab3–Noc2 complex dissociation to promote GLUT4 translocation in rat adipocytes
Source: Springer Nature journal article supplement (doi:10.1007/s00125-015-3627-3), 2015-05-29
Supplement: MOESM7 [file 8093050]

**ESM Table 1. List of oligonucleotide primers for qRT-PCR.**

| <b>Gene name</b>                              | <b>mRNA Accession number</b> | <b>Primer 5' &gt; 3'<br/>Forward primer, Reverse primer</b> | <b>Product size</b> |
|-----------------------------------------------|------------------------------|-------------------------------------------------------------|---------------------|
| <i>Rat Rab3A</i>                              | NM_013018                    | GCCAGCGTTGTCTCAGTTTA,<br>AATGAGGTTTTGCCCACT                 | 144                 |
| <i>Rat Rab3B</i>                              | NM_031091                    | CAGGTTACTGTGTGGGTGAAGA,<br>TGGGAGTTGTATCTTGGTAAATGA         | 137                 |
| <i>Rat Rab3C</i>                              | NM_133536                    | AAGGAAGTCTTTGATGTCAGTGG,<br>TGCAAGTAGCAGGTGTTTATAGATG       | 127                 |
| <i>Rat Rab3D</i>                              | NM_080580                    | ACCTGTCCTTCTTGCCTCTTC,<br>GAGAGAAAGGGAGCTGAACTTG            | 132                 |
| <i>Rat Rph3al</i>                             | NM_133591.2                  | CCCCTGTGGCTGTGTAAGAT,<br>CTTGGGGAGCCCTTTGTAGA               | 84                  |
| <i>Mouse Rab3A</i>                            | NM_001166399                 | AATGCAGTGCAGGACTGGTC,<br>ACACCACTCGCTCATCTTCC               | 106                 |
| <i>Mouse Rab3B</i>                            | NM_023537.5                  | CGCCATGGGCTTCATCCTA,<br>TGATCTGAGTGGACCAGTCCT               | 80                  |
| <i>Mouse Rab3C</i>                            | NM_023852.5                  | CGCTGTACAAGATTGGTCAACT,<br>ACCCGCTCATCTTCCATGTC             | 99                  |
| <i>Mouse Rab3D</i>                            | NM_031874.4                  | ACCGACATGACAAGAGGATCA,<br>TAGCTCCGCGATAGTAGGC               | 93                  |
| <i>Mouse TATA<br/>box Binding<br/>Protein</i> | NM_013684                    | TGGA AAAAGTTGTATTAACAGGTGCT,<br>TCCCTTTAAGATGGGGTAGATGT     | 82                  |
| <i>Rat 28S rRNA</i>                           | NR_046246.1                  | TTCACATCGTGGAGGATGATCT,<br>TACACAGTGAAACTTGCCACC            | 56                  |
