# Supplementary material for: Insulin regulates Rab3–Noc2 complex dissociation to promote GLUT4 translocation in rat adipocytes
Source: Springer Nature journal article supplement (doi:10.1007/s00125-015-3627-3), 2015-05-29
Supplement: MOESM8 [file 8093050]

**ESM Table 2. Mass spectrometry results**

|           | Protein                    | Protein accession no. | pI/Mass (Da) | Peptide Masses (Da)                                                                           | Amino acid positions and corresponding sequences                                                                                                                                          | Sequence coverage (%) |
|-----------|----------------------------|-----------------------|--------------|-----------------------------------------------------------------------------------------------|-------------------------------------------------------------------------------------------------------------------------------------------------------------------------------------------|-----------------------|
| MALDI-TOF | Ras-related protein Rab3B  | Q63941                | 4.85/24997   | 1634.81<br>983.33<br>1634.72<br>1671.69                                                       | 73-85 LQIWDTAGQERYR<br><b>137-143 CDMEEER</b><br><b>137-149 CDMEEERVIPTEK</b><br><b>187-202 MSDSMDTDPVSLGASK</b>                                                                          | 19                    |
|           |                            |                       |              |                                                                                               |                                                                                                                                                                                           |                       |
| ESI-Q-TOF | Ras-related protein Rab3B  | Q63941                | 4.85/24997   | 1099.66<br>1784.89<br>932.46                                                                  | 25-35 LLIIGNSSVGK<br><b>152-167 LLAEQLGFDFFEASAK</b><br><b>179-186 LVDAICDK</b>                                                                                                           | 15                    |
|           | Ras-related protein Rab11B | Q9ET14                | 5.64/24588   | 1206.50<br>979.46<br>1079.56<br>1273.60<br>943.47<br>1288.82<br>1159.65<br>1640.97<br>1020.63 | 5-13 DDEYDYLK<br>34-41 NEFNLESK<br>42-51 STIGVEFATR<br>62-72 AQIWDTAGQER<br>75-82 AITSAYR<br>83-95 GAVGALLVYDIK<br>96-104 HLTYENVER<br>111-125 DHADSNIVIMLVGNK<br><b>167-174 NILTEIYR</b> | 41                    |

<sup>a</sup> Peptides highlighted in bold are unique for the respective Rab isoform.
